# Supplementary material
Source: Springer Nature journal article supplement (https://www.springermedizin.de/resource/supplementary/12889_2013_6104_MOESM5_ESM.pdf/9494372)
Supplement: MOESM5 [file 9494372]

## Context

**Decision Making Context**

**Purpose, Goals and Values**

### Parameters

Decision-making processes

Decision-makers

Type of HIA

## Process

### Inputs

Proposal

Capacity and experience

Resources

Time

Organisational arrangements

### Procedure

Fidelity

Involvement of decision-makers and stakeholders

Transparency

Trade-offs

Review

## Impacts

### Proximal Impacts

Informing decisions

Changing decisions and implementation

Changes in health determinants

Predictive efficacy

Achieving goals

### Distal Impacts

Understanding

Learning

Influencing other activities

Engagement

Perception of HIA
